# Supplementary material
Source: PubMed Central journal article supplement (PMC3348191)
Supplement: supp_110896_chole-almadi-3-at.pdf [file supp_110896_chole-almadi-3-at.pdf]

**Appendix 3: Examples of different imaging modalities (Figures A and B) and treatments (Figure C) available for the management of suspected stones in the common bile duct**

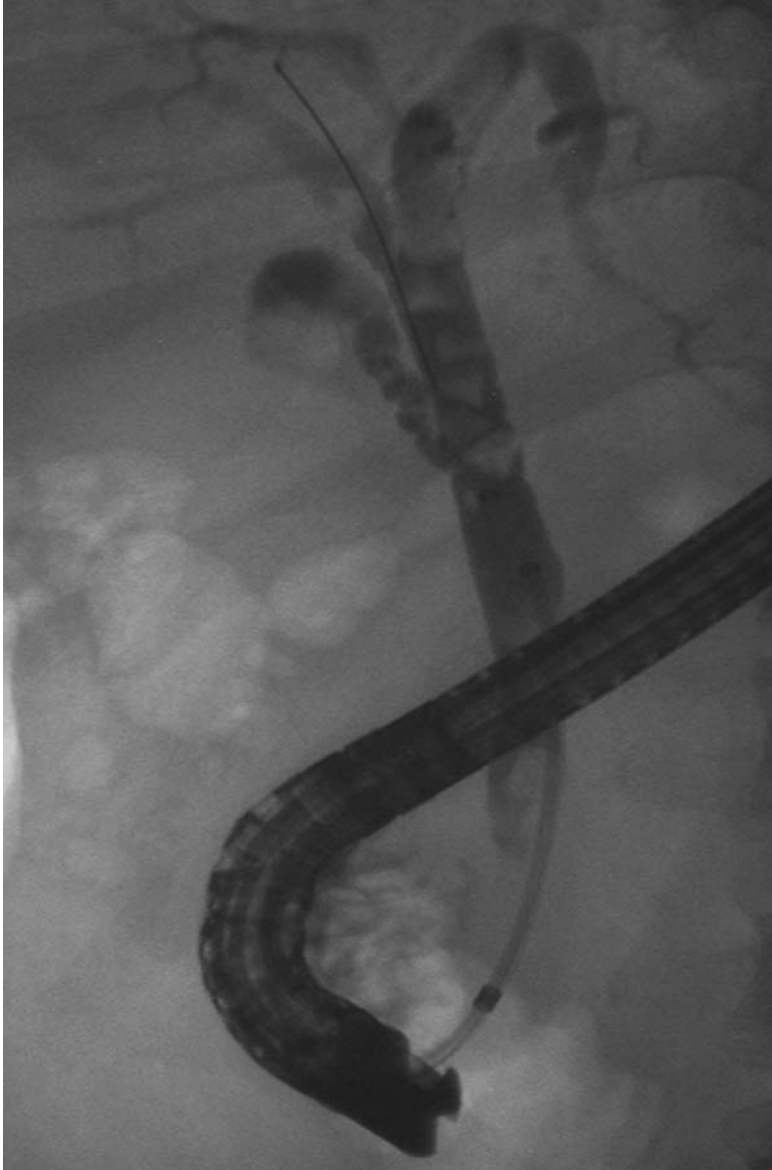

Figure A: Endoscopic retrograde cholangiopancreatography (ERCP) illustrating multiple stones in the common bile duct as filling defects.

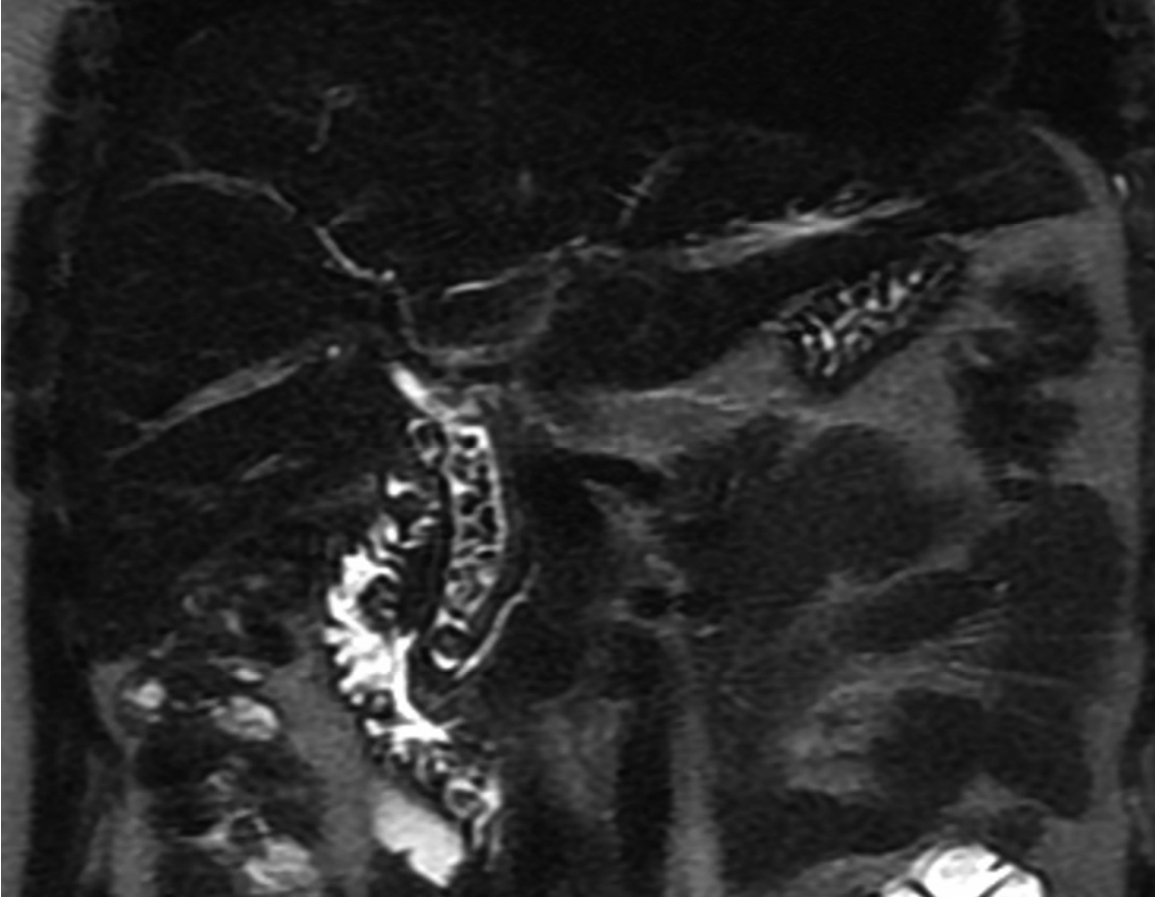

Figure B: Magnetic resonance cholangiopancreatography showing multiple stones in the common bile duct, as well as the pancreatic duct.

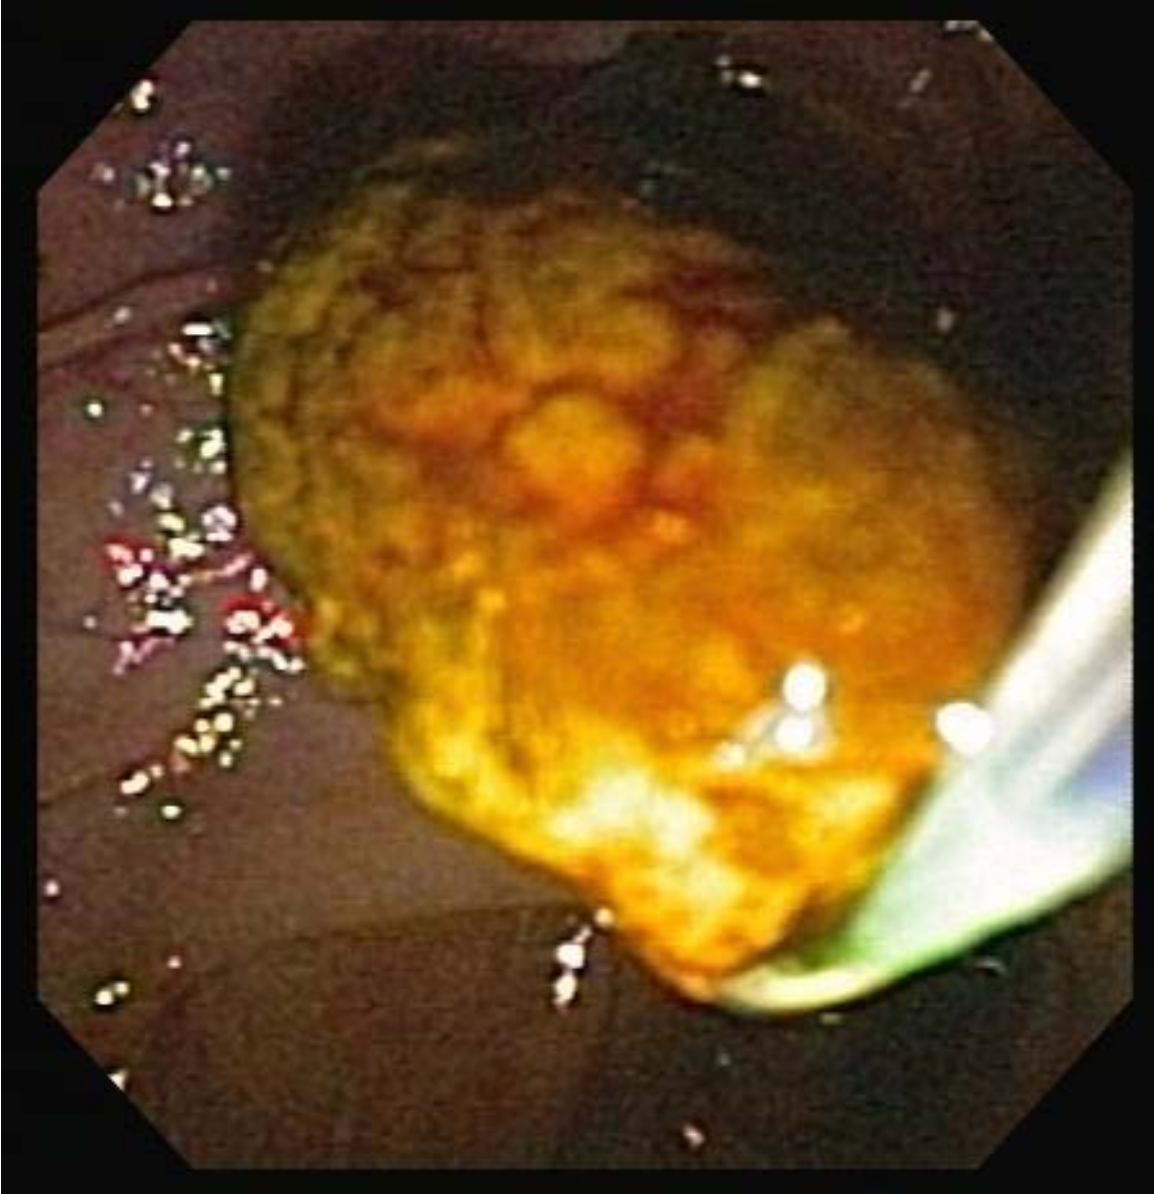

Figure C: Endoscopic view: Common bile duct stone being removed with a balloon catheter.
