# Supplementary material
Source: PubMed Central journal article supplement (PMC3348191)
Supplement: supp_110896_chole-almadi-4-at.pdf [file supp_110896_chole-almadi-4-at.pdf]

#### Appendix 4: Selected guidelines pertaining to the management of patients with common bile duct stones

| Authority        | Year of publication | Title                                                                                                             | Method                                 | Graded evidence and recommendation      |
|------------------|---------------------|-------------------------------------------------------------------------------------------------------------------|----------------------------------------|-----------------------------------------|
| NIH              | 2002                | State-of-the-science statement on endoscopic retrograde cholangiopancreatography (ERCP) for diagnosis and therapy | Systematic review and expert consensus | No                                      |
| ASGE             | 2005                | The role of ERCP in diseases of the biliary tract and the pancreas                                                | Narrative review and expert consensus  | Graded recommendations                  |
|                  | 2007                | The role of EUS                                                                                                   |                                        | Graded the evidence and recommendations |
|                  | 2005                | Guidelines for endoscopy in pregnant and lactating women                                                          |                                        | Graded recommendations                  |
|                  | 2010                | The role of endoscopy in the evaluation of suspected choledocholithiasis                                          |                                        | Graded the evidence and recommendations |
| ACG              | 2006                | Practice guidelines in acute pancreatitis                                                                         | Narrative review and expert consensus  | Graded the evidence                     |
| Tokyo Guidelines | 2007                | Definitions, pathophysiology, and epidemiology of acute cholangitis and cholecystitis                             | Narrative review and expert consensus  | Graded the evidence                     |
|                  | 2007                | Methods and timing of biliary drainage for acute cholangitis                                                      |                                        |                                         |
|                  | 2007                | Techniques of biliary drainage for acute cholecystitis                                                            |                                        |                                         |
|                  | 2007                | Flowcharts for the diagnosis and treatment of acute cholangitis and cholecystitis                                 |                                        |                                         |
| BSG              | 2008                | Guidelines on the management of common bile duct stones                                                           | Narrative review and expert consensus  | Graded the evidence and recommendations |
| SSAT             | 2007                | SSAT Patient Care Guidelines Treatment of gallstone and gallbladder                                               | Narrative review                       | No                                      |
| AGA              | 2007                | AGA Institute medical position statement on acute pancreatitis                                                    | Narrative review                       | No                                      |
| SAGES            | 2008                | Guidelines for diagnosis, treatment, and use of laparoscopy for surgical problems during pregnancy                | Narrative review and expert consensus  | Graded the evidence and recommendations |
|                  | 2010                | SAGES guidelines for the clinical application of laparoscopic biliary tract surgery                               | Systematic review and expert consensus | Graded the evidence and recommendations |

ACG: American College of Gastroenterology, AGA: American Gastroenterological Association, ASGE: American Society for Gastrointestinal Endoscopy, BSG: British Society of Gastroenterology, CBDS: common bile duct stone, ERCP: endoscopic retrograde cholangiopancreatography, EUS: endoscopic ultrasound, NIH: National Institute of Health, SAGES: The Society of American Gastrointestinal and Endoscopic Surgeons, SSAT: Society for Surgery of the Alimentary Tract.
