# Supplementary material
Source: PubMed Central journal article supplement (PMC3348191)
Supplement: supp_110896_chole-almadi-5-at.pdf [file supp_110896_chole-almadi-5-at.pdf]

## Appendix 5: Specialized endoscopic techniques for the removal of large stones in the common bile duct when ERCP has failed

| Specialized endoscopic technique                                                           | Description                                                                                                                                                                                                                                                           | Advantages                                                                                                                          | Limitations                                                                                                          |
|--------------------------------------------------------------------------------------------|-----------------------------------------------------------------------------------------------------------------------------------------------------------------------------------------------------------------------------------------------------------------------|-------------------------------------------------------------------------------------------------------------------------------------|----------------------------------------------------------------------------------------------------------------------|
| Endoscopic papillary balloon dilatation (EPBD) after a limited sphincterotomy <sup>1</sup> | After performing a limited sphincterotomy, a balloon dilator is introduced through the papilla and then dilated (sometimes at a separate setting) for up to five minutes; stones are then removed using any of the retrieval accessories available to the endoscopist | Success rate 91 - 98%*<br>Decreases the need for a large sphincterotomy and intracorporeal mechanical lithotripsy of the CBD stones | To be used cautiously in patients with coagulopathy                                                                  |
| Mechanical lithotripsy <sup>2,3</sup>                                                      | The mechanical lithotripsy device is similar to the regular biliary extraction basket but with a stronger tensile strength and metal sheath; with the aid of an external device, mechanical force is applied to fragment the stone                                    | Success rate 78 - 95%*<br>Widely available and simple to operate                                                                    | Increased failure rates when stone-to-CBD diameter ratio >1, and stone size ≥ 30 mm; complication of stone impaction |
| Intracorporeal electrohydraulic lithotripsy (EHL) <sup>4,5</sup>                           | Through a probe, electrical energy is transformed into shock waves that fragment stones that the probe is positioned against while immersed in fluid                                                                                                                  | Success rate 74 - 97%*                                                                                                              | Requires targeting through fluoroscopy or cholangioscopy; risk of hemobilia, and CBD perforation                     |
| Endoscopic laser lithotripsy <sup>6-8</sup>                                                | A light energy at a certain wave length is amplified and concentrated into a beam; when applied directly onto the CBD stones, it causes a shock wave and fragmentation                                                                                                | Stone clearance rates approximate 88% for difficult stones up to 20 mm in size                                                      | Not widely available; expensive; complications include hemobilia, pancreatitis and cholangitis                       |
| Extracorporeal shockwave lithotripsy (ESWL) <sup>9-12</sup>                                | High-intensity acoustic pulse that fragments stones. It is generated and applied to the target, CBDS, from a source outside of the patient                                                                                                                            | Stone clearance rates 75 - 86%* in patients who failed ERCP. Water bath immersion usually required                                  | Mild transient hemobilia; microhematuria                                                                             |

CBD: common bile duct, CBDS: common bile duct stones, ERCP: endoscopic retrograde cholangiopancreatography.

\*Using different reference gold standards.

### References

1. Attam R, Freeman ML. Endoscopic papillary large balloon dilation for large common bile duct stones. *JHepatobiliaryPancreatSurg* 2009;16:618-23.
2. Lee SH, Park JK, Yoon WJ, et al. How to predict the outcome of endoscopic mechanical lithotripsy in patients with difficult bile duct stones? *ScandJGastroenterol* 2007;42:1006-10.
3. Garg PK, Tandon RK, Ahuja V, Makharia GK, Batra Y. Predictors of unsuccessful mechanical lithotripsy and endoscopic clearance of large bile duct stones. *Gastrointest Endosc* 2004;59:601-5.
4. Piraka C, Shah RJ, Awadallah NS, Langer DA, Chen YK. Transpapillary cholangioscopy-directed lithotripsy in patients with difficult bile duct stones. *Clin Gastroenterol Hepatol* 2007;5:1333-8.
5. Chen YK, Pleskow DK. SpyGlass single-operator peroral cholangiopancreatography system for the diagnosis and therapy of bile-duct disorders: a clinical feasibility study (with video). *GastrointestEndosc* 2007;65:832-41.
6. Prat F, Fritsch J, Choury AD, Frouge C, Marteau V, Etienne JP. Laser lithotripsy of difficult biliary stones. *Gastrointest Endosc* 1994;40:290-5.

7. Kim TH, Oh HJ, Choi CS, Yeom DH, Choi SC. Clinical usefulness of transpapillary removal of common bile duct stones by frequency doubled double pulse Nd:YAG laser. *World JGastroenterol* 2008;14:2863-6.
8. Jakobs R, Adamek HE, Maier M, et al. Fluoroscopically guided laser lithotripsy versus extracorporeal shock wave lithotripsy for retained bile duct stones: a prospective randomised study. *Gut* 1997;40:678-82.
9. Sauerbruch T, Holl J, Sackmann M, Paumgartner G. Fragmentation of bile duct stones by extracorporeal shock-wave lithotripsy: a five-year experience. *Hepatology* 1992;15:208-14.
10. Adamek HE, Maier M, Jakobs R, Wessbecher FR, Neuhauser T, Riemann JF. Management of retained bile duct stones: a prospective open trial comparing extracorporeal and intracorporeal lithotripsy. *Gastrointest Endosc* 1996;44:40-7.
11. Sauerbruch T, Stern M. Fragmentation of bile duct stones by extracorporeal shock waves. A new approach to biliary calculi after failure of routine endoscopic measures. *Gastroenterology* 1989;96:146-52.
12. Lomanto D, Fiocca F, Nardovino M, et al. ESWL experience in the therapy of difficult bile duct stones. *Dig Dis Sci* 1996;41:2397-403.
